# Supplementary material
Source: PubMed Central journal article supplement (PMC4793668)
Supplement: donm018985.ww1_default.pdf [file donm018985.ww1_default.pdf]

## Appendix 1: Supplementary tables A-B [posted as supplied by author]

Table A

| Variable                                | OR (95% Confidence Interval) | P Value |
|-----------------------------------------|------------------------------|---------|
| Age                                     | 0.99 (0.98 – 0.99)           | < 0.001 |
| Male Sex                                | 0.85 (0.78 – 0.92)           | < 0.001 |
| Time to Initiation of CPR               | 0.99 (0.93 – 1.07)           | 0.9     |
| Witnessed Event                         | 1.44 (1.31 – 1.57)           | < 0.001 |
| Asystole                                | 0.78 (0.72 – 0.85)           | < 0.001 |
| ECG Monitor                             | 1.45 (1.29 – 1.64)           | < 0.001 |
| Evening or After Hours Arrest           | 0.78 (0.71 – 0.85)           | < 0.001 |
| Location of Arrest                      |                              |         |
| General Floor or Ward with Telemetry    | Ref.                         | Ref.    |
| General Floor or Ward without Telemetry | 0.90 (0.74 – 1.08)           | 0.2     |
| Telemetry Monitored Step-Down Unit      | 1.13 (1.01 – 1.28)           | 0.04    |
| Hospital Teaching Status                |                              |         |
| Major                                   | Ref.                         | Ref.    |
| Minor                                   | 0.83 (0.75 – 0.92)           | < 0.001 |
| Non-Teaching                            | 0.85 (0.77 – 0.94)           | 0.002   |
| Admission Category                      |                              |         |
| Medical Non-Cardiac                     | Ref.                         | Ref.    |
| Medical Cardiac                         | 1.04 (0.93 – 1.15)           | 0.5     |
| Surgical Non-Cardiac                    | 1.34 (1.18 – 1.52)           | < 0.001 |
| Surgical Cardiac                        | 2.19 (1.84 – 2.62)           | < 0.001 |
| Other                                   | 1.65 (1.15 – 2.36)           | 0.006   |
| Co-Existing Conditions                  |                              |         |
| New Congestive Heart Failure Diagnosis  | 1.23 (1.10 – 1.36)           | < 0.001 |
| Respiratory Insufficiency               | 1.19 (1.09 – 1.29)           | < 0.001 |
| Diabetes                                | 1.28 (1.17 – 1.39)           | < 0.001 |
| Cancer                                  | 0.56 (0.49 – 0.65)           | < 0.001 |
| Hepatic Insufficiency                   | 0.65 (0.53 – 0.78)           | < 0.001 |
| Sepsis                                  | 0.87 (0.77 – 0.99)           | 0.04    |
| Year of Arrest (2005 Guideline Changes) | 1.36 (1.24 – 1.49)           | < 0.001 |

Table B

| Variable                  | N Missing |
|---------------------------|-----------|
| Age                       | 12        |
| ECG monitor               | 1         |
| Witness                   | 2         |
| CHF                       | 2319      |
| Respiratory Insufficiency | 2319      |
| Hepatic Insufficiency     | 2319      |
| Diabetes Mellitus         | 2319      |
| Cancer                    | 2319      |
| Hospital Teaching status  | 1800      |
