# Supplementary material
Source: PubMed Central journal article supplement (PMC4793668)
Supplement: donm018985.ww2_default.pdf [file donm018985.ww2_default.pdf]

Appendix 2: supplementary figures A-D [posted as supplied by author]

Figure A: The probability of sustained return of spontaneous circulation with delays in time to epinephrine. Unadjusted and adjusted odds ratios and 95% confidence intervals are reported.

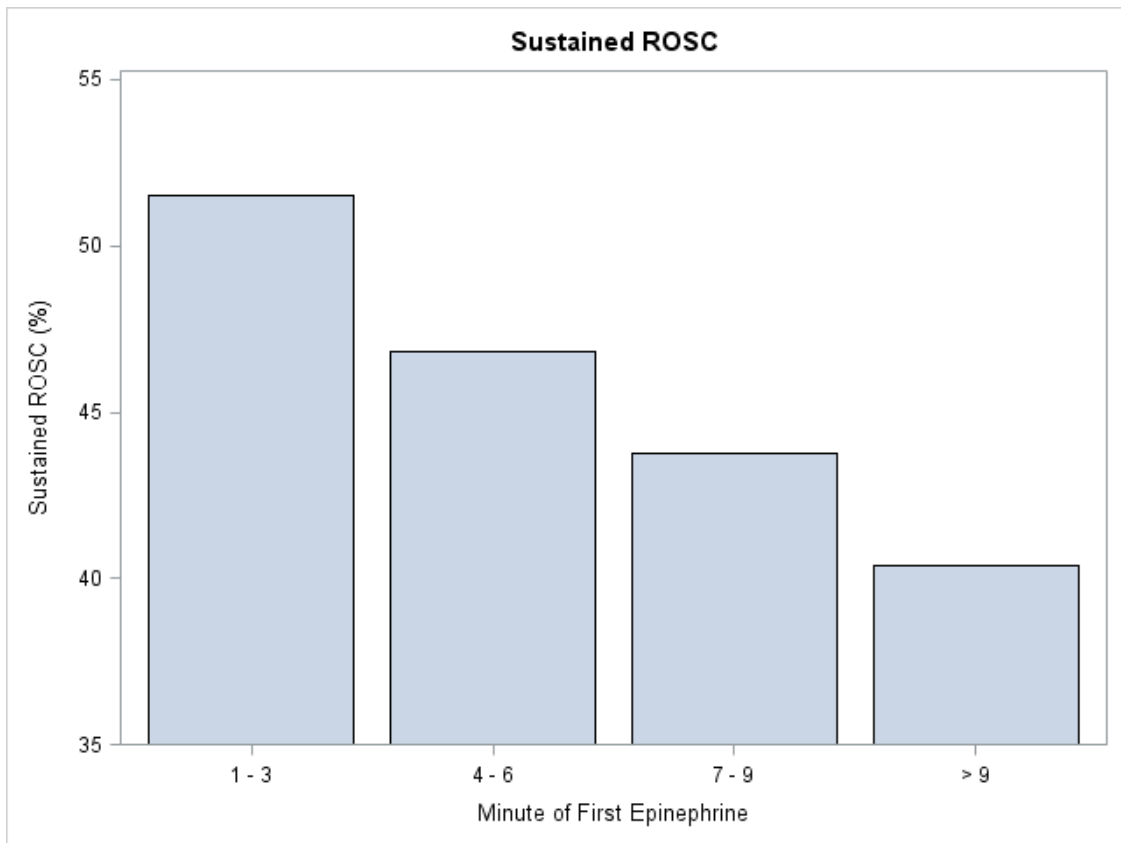

| Min. of Epinephrine | No. with Sustained ROSC (%) | Unadjusted Odds Ratio (95% CI) | Adjusted Odds Ratio (95% CI) | P Value |
|---------------------|-----------------------------|--------------------------------|------------------------------|---------|
| 1 - 3               | 7,217 (52)                  | Ref.                           | Ref.                         | -       |
| 4 - 6               | 3,234 (47)                  | 0.83 (0.78 to 0.88)            | 0.90 (0.85 to 0.96)          | < 0.001 |
| 7 - 9               | 1,002 (44)                  | 0.73 (0.67 to 0.80)            | 0.81 (0.74 to 0.89)          | < 0.001 |
| > 9                 | 762 (40)                    | 0.64 (0.58 to 0.70)            | 0.70 (0.61 to 0.75)          | < 0.001 |

Figure B: The probability of 24-hour survival with delays in time to epinephrine.

Unadjusted and adjusted odds ratios and 95% confidence intervals are reported.

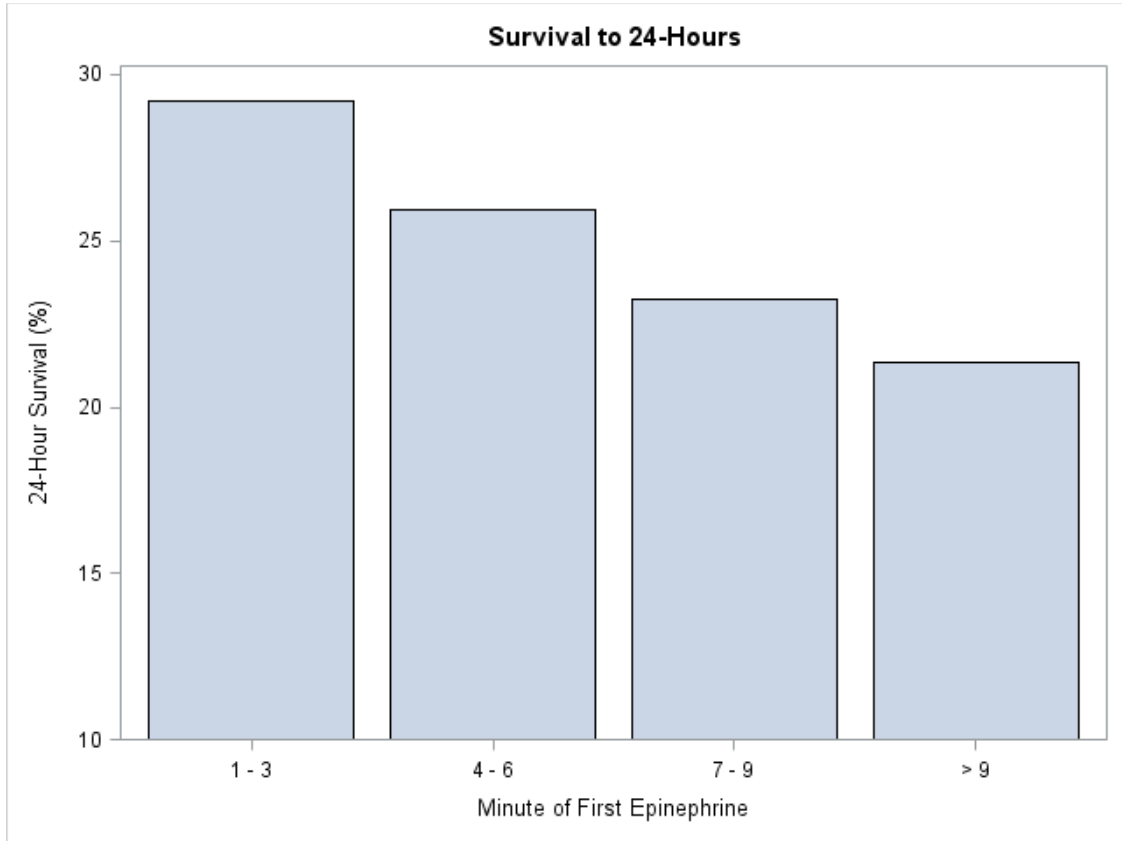

| Min. of Epinephrine | No. Survived to 24 Hours (%) | Unadjusted Odds Ratio (95% CI) | Adjusted Odds Ratio (95% CI) | <i>P</i> Value |
|---------------------|------------------------------|--------------------------------|------------------------------|----------------|
| 1 - 3               | 4,096 (29)                   | Ref.                           | Ref.                         | –              |
| 4 - 6               | 1,789 (26)                   | 0.85 (0.80 to 0.91)            | 0.91 (0.85 to 0.97)          | 0.005          |
| 7 - 9               | 532 (23)                     | 0.74 (0.67 to 0.82)            | 0.80 (0.72 to 0.89)          | < 0.001        |
| > 9                 | 403 (21)                     | 0.66 (0.59 to 0.75)            | 0.70 (0.62 to 0.79)          | < 0.001        |

Figure C: The probability of neurologically intact survival with delays in time to epinephrine. Unadjusted and adjusted odds ratios and 95% confidence intervals are reported. \* 359 patients (2%) were missing Cerebral Performance Category scores and were therefore not evaluated in this analysis.

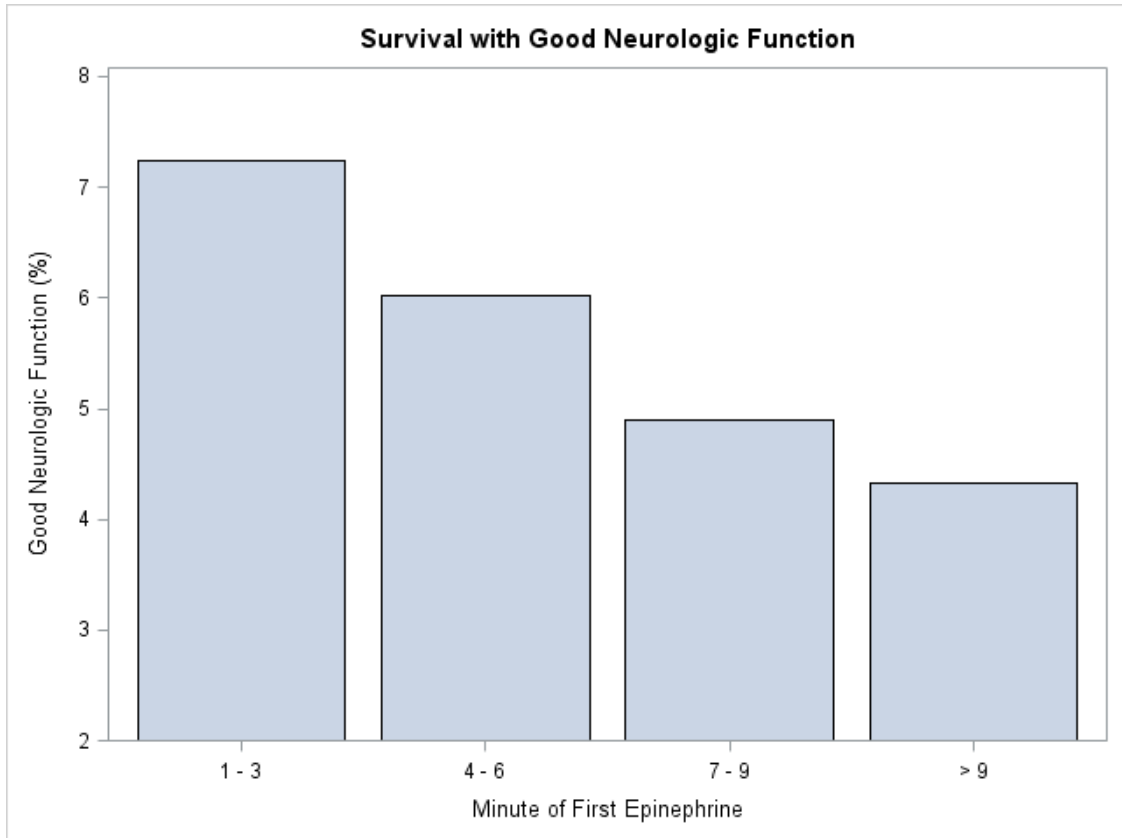

| Min. of Epinephrine | No. Survived with Favorable Neurologic Status (%) | Unadjusted Odds Ratio (95% CI) | Adjusted Odds Ratio (95% CI) | P Value |
|---------------------|---------------------------------------------------|--------------------------------|------------------------------|---------|
| 1 - 3               | 999 (7)                                           | Ref.                           | Ref.                         | —       |
| 4 - 6               | 410 (6)                                           | 0.82 (0.73 to 0.92)            | 0.93 (0.82 to 1.06)          | 0.27    |
| 7 - 9               | 111 (5)                                           | 0.66 (0.54 to 0.81)            | 0.77 (0.62 to 0.95)          | 0.01    |
| > 9                 | 81 (4)                                            | 0.58 (0.46 to 0.73)            | 0.68 (0.53 to 0.86)          | 0.002   |

\* 359 patients with missing discharge CPC data.

Figure D: The probability of survival by quartiles of epinephrine. Unadjusted and adjusted odds ratios and 95% confidence intervals are reported.

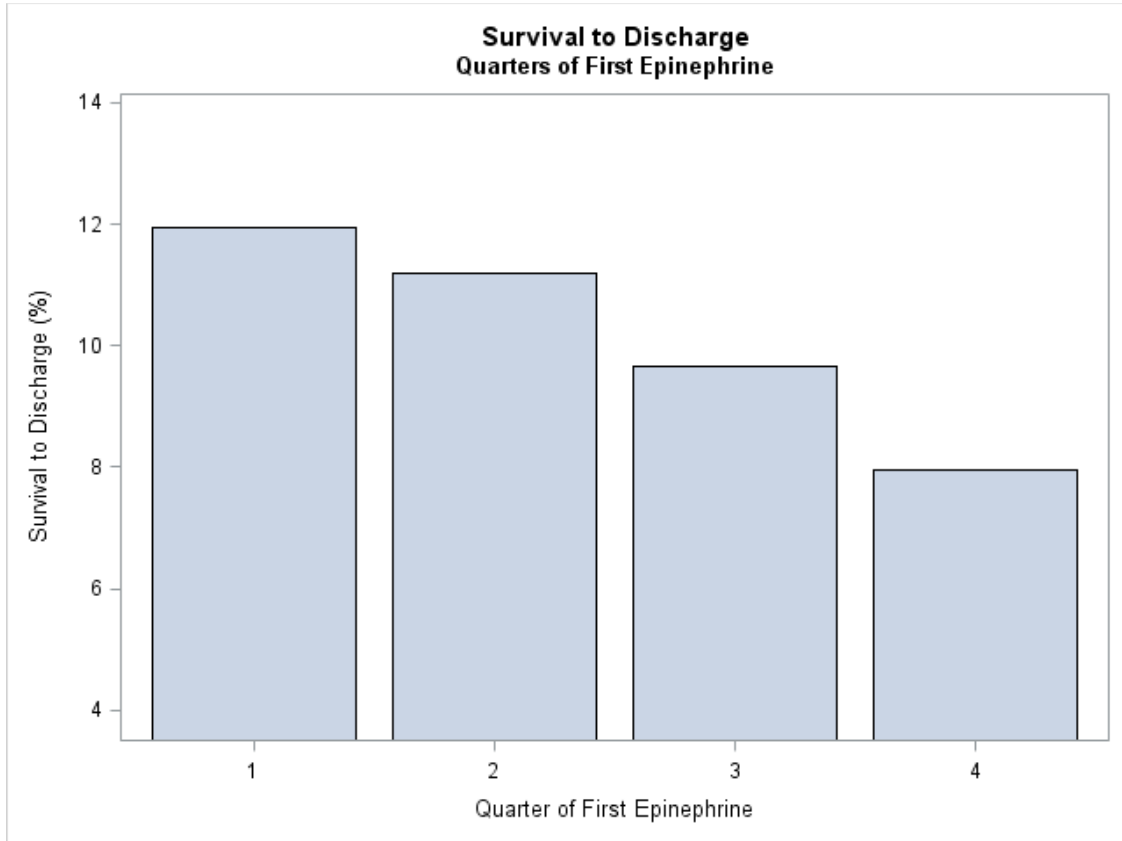

| Quarter of Epinephrine | No. of Patients Survived (%) | Unadjusted Odds Ratio (95% CI) | Adjusted Odds Ratio (95% CI) | <i>P</i> Value |
|------------------------|------------------------------|--------------------------------|------------------------------|----------------|
| 1                      | 929 (12)                     | Ref.                           | Ref.                         | –              |
| 2                      | 697 (11)                     | 0.93 (0.84 to 1.03)            | 1.00 (0.89 to 1.11)          | 0.9            |
| 3                      | 543 (10)                     | 0.79 (0.71 to 0.88)            | 0.90 (0.81 to 1.02)          | 0.09           |
| 4                      | 434 (8)                      | 0.64 (0.56 to 0.72)            | 0.74 (0.65 to 0.84)          | < 0.001        |
